# Supplementary material for: Fibulin-3 Promotes Glioma Growth and Resistance through a Novel Paracrine Regulation of Notch Signaling
Source: Oxford University Press journal article supplement (doi:10.1158/0008-5472.can-12-1060), 2012-06-05
Supplement: 00085472can121060-sup-f1_473k.pdf [file 00085472can121060-sup-f1_473k.pdf]

A

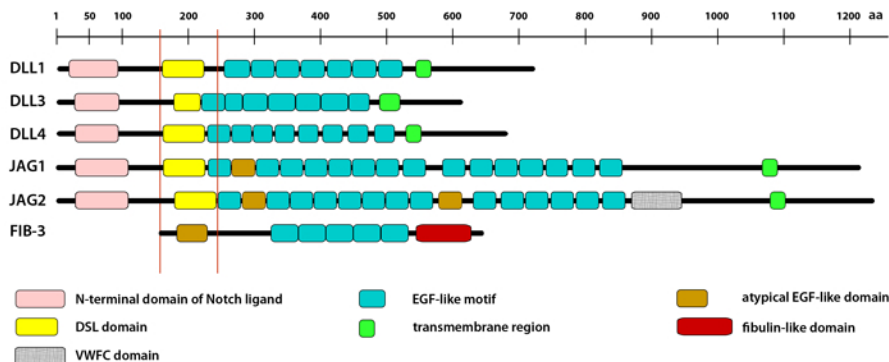

B

| DSL motif                       | -- C -- -- Y -- -- C -- -- C -- -- -- -- -- C -- -- G -- -- C -- -- G W - G -- C                    |
|---------------------------------|-----------------------------------------------------------------------------------------------------|
| Homo sapiens DLL1 (177-221)     | F V C D E H Y Y G E G C S V F C R P R D D A - F G H F T C G E R G E K V C N P G W K G P Y C         |
| Homo sapiens DLL3 (176-214)     | A R C E P P A V G T A C T R L C R P R S - - - A P S R C G P - G L R P C A P - - L E D E C           |
| Homo sapiens DLL4 (173-217)     | V I C S D N Y Y G D N C S R L C R K R N D H - F G H Y V C Q P D G N L S C L P G W T G E Y C         |
| Homo sapiens JAG1 (185-229)     | V T C D D Y Y G F G C N K F C R P R D D F - F G H Y A C D Q N G N K T C M E G W M G P E C           |
| Homo sapiens JAG2 (196-240)     | V R C D E N Y Y S A T C N K F C R P R N D F - F G H Y T C D Q Y G N K A C M D G W M G K E C         |
| Homo sapiens FIB-3 (27-70)      | T Q C T D G Y E W D P V R Q Q C K D I D E C D I V P D A C K - - G G M K C V N H Y G G Y L C         |
| Rattus norvegicus FIB-3 (27-70) | T Q C T D G Y E W D P V R Q Q C K D I D E C D I V P D A C K - - G G M K C V N H Y G G Y L C         |
| Mus musculus FIB-3 (27-70)      | T Q C T D G Y E W D P I R Q Q C K D I D E C D I V P D A C K - - G G M K C V N H Y G G Y L C         |
| Bos Taurus FIB-3 (27-70)        | T Q C T D G Y E W D P V R Q Q C K D I D E C D I V P D A C K - - G G M K C V N H Y G G Y L C         |
| Canis familiaris FIB-3 (27-20)  | T Q C T D G Y E W D P V R Q Q C K D I D E C D I V P D A C K - - G G M K C V N H Y G G Y L C         |
| <b>consensus</b>                | -- C -- -- Y -- -- C -- -- C <u>b</u> - - - <u>a</u> - - - - - C -- -- G -- -- C -- -- g w - G -- C |
